# Supplementary material for: Chronostratigraphic framework and provenance of the Ossa-Morena Zone Carboniferous basins (SW Iberia)
Source: Copernicus journal article supplement (doi:10.5194/se-2020-26), 2020-03-11
Supplement: Supplementary file 1 [file se-2020-26-supplement.zip]

**Table S1- SHRIMP U-Pb zircon geochronology of samples SCV-2, SCV-30 and SCV-7**

SHRIMPTOOLS data processing; IBERSIMS laboratory, University of Granada, Spain

Errors are at one sigma level. The error in 206/238 averaging the standard has been already propagated. Th/U ratios are atomic (232/238), not in weight

Point-to point errors, calculated on replicates of the TEMORA standard, are: 0.46 % for 206Pb/238U, and 1.04 % for 207Pb/206Pb

| id        | U<br>(ppm) | Th<br>(ppm) | Th/U |            |         |            |         |       | common lead uncorrected |      |            |      |         |
|-----------|------------|-------------|------|------------|---------|------------|---------|-------|-------------------------|------|------------|------|---------|
|           |            |             |      | 206Pb/238U | ±err    | 207Pb/235U | ±err    | rho   | ages (Ma)               |      |            |      |         |
|           |            |             |      |            |         |            |         |       | 207Pb/206Pb             | ±err | 206Pb/238U | ±err | % disc. |
| SCV2-10.1 | 1037       | 448         | 0,44 | 0,05286    | 0,00060 | 0,36680    | 0,00504 | 0,600 | 210,1                   | 17,6 | 332,0      | 3,7  | -4,6    |
| SCV2-11.1 | 1333       | 662         | 0,51 | 0,05397    | 0,00080 | 0,58257    | 0,01009 | 0,613 | 1154,3                  | 18,0 | 338,8      | 4,8  | 27,4    |
| SCV2-12.1 | 1695       | 1513        | 0,92 | 0,05379    | 0,00085 | 0,91403    | 0,02719 | 0,384 | 2003,5                  | 44,0 | 337,8      | 5,2  | 48,8    |
| SCV2-13.1 | 2683       | 1820        | 0,70 | 0,07356    | 0,00712 | 3,51291    | 0,33863 | 0,722 | 3685,3                  | 3,2  | 457,6      | 42,9 | 70,0    |
| SCV2-14.1 | 695        | 244         | 0,36 | 0,05011    | 0,00114 | 0,46393    | 0,02037 | 0,373 | 842,3                   | 76,4 | 315,2      | 7,0  | 18,6    |
| SCV2-15.1 | 370        | 96          | 0,27 | 0,05285    | 0,00097 | 0,39689    | 0,01309 | 0,402 | 390,3                   | 60,2 | 332,0      | 6,0  | 2,2     |
| SCV2-16.1 | 1125       | 488         | 0,45 | 0,05299    | 0,00069 | 0,39531    | 0,00783 | 0,474 | 375,5                   | 33,2 | 332,8      | 4,2  | 1,6     |
| SCV2-17.1 | 1321       | 425         | 0,33 | 0,05423    | 0,00074 | 0,46023    | 0,00740 | 0,612 | 658,5                   | 18,0 | 340,4      | 4,5  | 11,4    |
| SCV2-18.1 | 2721       | 1429        | 0,54 | 0,05664    | 0,00215 | 0,79139    | 0,03046 | 0,711 | 1640,3                  | 12,8 | 355,2      | 13,2 | 40,0    |
| SCV2-19.1 | 1386       | 597         | 0,44 | 0,05205    | 0,00126 | 0,41891    | 0,01445 | 0,503 | 543,9                   | 53,0 | 327,1      | 7,7  | 8,0     |
| SCV2-2.2  | 344        | 72          | 0,21 | 0,05413    | 0,00172 | 0,40052    | 0,01862 | 0,492 | 357,1                   | 74,8 | 339,8      | 10,5 | 0,6     |
| SCV2-21.1 | 815        | 260         | 0,33 | 0,05616    | 0,00115 | 0,40338    | 0,01227 | 0,486 | 289,7                   | 50,4 | 352,2      | 7,0  | -2,4    |
| SCV2-22.1 | 2226       | 970         | 0,45 | 0,05580    | 0,00158 | 0,41455    | 0,01195 | 0,707 | 366,3                   | 12,2 | 350,0      | 9,6  | 0,6     |
| SCV2-23.1 | 4698       | 4329        | 0,95 | 0,04240    | 0,00290 | 1,34528    | 0,08830 | 0,751 | 2980,5                  | 7,0  | 267,7      | 18,0 | 69,0    |
| SCV2-24.1 | 329        | 86          | 0,27 | 0,05435    | 0,00103 | 0,51722    | 0,01707 | 0,415 | 899,3                   | 54,8 | 341,2      | 6,4  | 19,4    |
| SCV2-25.1 | 382        | 178         | 0,48 | 0,05936    | 0,00202 | 1,49644    | 0,05432 | 0,675 | 2678,9                  | 20,6 | 371,7      | 12,3 | 60,0    |
| SCV2-26.1 | 1210       | 375         | 0,32 | 0,05323    | 0,00168 | 0,42180    | 0,01355 | 0,706 | 509,5                   | 14,0 | 334,3      | 10,2 | 6,4     |
| SCV2-27.1 | 594        | 289         | 0,50 | 0,05764    | 0,00162 | 1,12021    | 0,04062 | 0,557 | 2238,9                  | 39,2 | 361,3      | 9,9  | 52,6    |
| SCV2-28.1 | 460        | 131         | 0,29 | 0,05245    | 0,00056 | 0,41405    | 0,00937 | 0,340 | 501,3                   | 43,4 | 329,5      | 3,4  | 6,4     |
| SCV2-29.1 | 343        | 82          | 0,24 | 0,05378    | 0,00052 | 0,40507    | 0,00738 | 0,386 | 397,1                   | 34,0 | 337,7      | 3,2  | 2,2     |
| SCV2-3.1  | 4692       | 3208        | 0,70 | 0,05334    | 0,00091 | 0,36662    | 0,00604 | 0,742 | 0,0                     | 0,0  | 335,0      | 5,6  | -5,6    |

|            |      |      |      |         |         |         |         |       |        |      |       |      |      |
|------------|------|------|------|---------|---------|---------|---------|-------|--------|------|-------|------|------|
| SCV2-30.1  | 598  | 160  | 0,28 | 0,05340 | 0,00081 | 0,37321 | 0,00624 | 0,653 | 226,5  | 16,2 | 335,4 | 5,0  | -4,2 |
| SCV2-31.1  | 1495 | 1042 | 0,71 | 0,05313 | 0,00086 | 0,70542 | 0,01425 | 0,575 | 1553,5 | 22,6 | 333,7 | 5,2  | 38,4 |
| SCV2-32.1  | 2558 | 1967 | 0,79 | 0,08077 | 0,00650 | 5,02282 | 0,40713 | 0,715 | 4086,9 | 15,6 | 500,7 | 38,9 | 72,6 |
| SCV2-33.1  | 1896 | 760  | 0,41 | 0,05077 | 0,00109 | 0,35960 | 0,00975 | 0,568 | 257,5  | 37,8 | 319,2 | 6,6  | -2,4 |
| SCV2-34.1  | 621  | 194  | 0,32 | 0,05245 | 0,00120 | 0,37817 | 0,01016 | 0,614 | 298,1  | 31,6 | 329,6 | 7,4  | -1,2 |
| SCV2-35.1  | 1762 | 864  | 0,50 | 0,05721 | 0,00202 | 1,66707 | 0,05911 | 0,716 | 2915,9 | 6,0  | 358,6 | 12,3 | 64,0 |
| SCV2-36.1  | 579  | 247  | 0,44 | 0,05640 | 0,00165 | 0,78299 | 0,02364 | 0,696 | 1636,9 | 14,2 | 353,7 | 10,1 | 39,8 |
| SCV2-38.1  | 1008 | 413  | 0,42 | 0,05077 | 0,00038 | 0,39465 | 0,00354 | 0,602 | 467,1  | 11,0 | 319,3 | 2,4  | 5,4  |
| SCV2-39.1  | 398  | 87   | 0,22 | 0,05368 | 0,00084 | 0,38448 | 0,00905 | 0,481 | 283,1  | 39,6 | 337,1 | 5,2  | -2,0 |
| SCV2-4.1   | 651  | 218  | 0,34 | 0,05581 | 0,00119 | 0,38575 | 0,00987 | 0,601 | 201,1  | 32,4 | 350,1 | 7,3  | -5,6 |
| SCV2-40.1  | 736  | 338  | 0,47 | 0,05310 | 0,00123 | 0,37520 | 0,00996 | 0,628 | 251,9  | 29,6 | 333,5 | 7,5  | -3,0 |
| SCV2-41.1  | 1287 | 392  | 0,31 | 0,05145 | 0,00080 | 0,41677 | 0,00757 | 0,616 | 558,1  | 20,4 | 323,4 | 4,9  | 8,6  |
| SCV2-42.1  | 274  | 46   | 0,17 | 0,05378 | 0,00075 | 0,41030 | 0,01542 | 0,267 | 425,7  | 76,0 | 337,7 | 4,6  | 3,2  |
| SCV2-43.1  | 867  | 307  | 0,36 | 0,05287 | 0,00065 | 0,37124 | 0,00638 | 0,514 | 237,3  | 27,6 | 332,1 | 3,9  | -3,6 |
| SCV2-44.1  | 671  | 208  | 0,32 | 0,05327 | 0,00066 | 0,37734 | 0,00545 | 0,613 | 257,9  | 17,2 | 334,5 | 4,0  | -2,8 |
| SCV2-46.1  | 1264 | 596  | 0,48 | 0,05251 | 0,00088 | 0,36406 | 0,00696 | 0,631 | 207,9  | 21,2 | 329,9 | 5,3  | -4,6 |
| SCV2-47.1  | 570  | 165  | 0,30 | 0,05200 | 0,00088 | 0,37133 | 0,00918 | 0,490 | 276,1  | 41,0 | 326,8 | 5,4  | -2,0 |
| SCV2-48.1  | 870  | 318  | 0,38 | 0,04732 | 0,00162 | 0,33367 | 0,01173 | 0,702 | 247,3  | 18,0 | 298,0 | 9,9  | -2,0 |
| SCV2-5.1   | 3266 | 1234 | 0,39 | 0,05747 | 0,00244 | 0,42642 | 0,01788 | 0,728 | 328,5  | 8,8  | 360,2 | 14,9 | 0,2  |
| SCV2-6.1   | 544  | 166  | 0,31 | 0,05543 | 0,00076 | 0,53703 | 0,01064 | 0,501 | 936,1  | 28,8 | 347,8 | 4,7  | 20,4 |
| SCV2-7.1   | 881  | 352  | 0,41 | 0,05186 | 0,00093 | 0,46694 | 0,01021 | 0,590 | 783,9  | 26,2 | 325,9 | 5,6  | 16,2 |
| SCV2-8.1   | 280  | 55   | 0,20 | 0,05239 | 0,00139 | 0,39190 | 0,01990 | 0,375 | 381,7  | 94,6 | 329,2 | 8,5  | 2,0  |
| SCV2-9.1   | 1367 | 464  | 0,35 | 0,05219 | 0,00091 | 0,49509 | 0,01169 | 0,531 | 892,9  | 32,6 | 327,9 | 5,5  | 19,8 |
| SCV30-1.1  | 457  | 199  | 0,45 | 0,05469 | 0,00092 | 0,40903 | 0,00832 | 0,598 | 381,3  | 25,2 | 343,2 | 5,6  | 1,4  |
| SCV30-10.1 | 396  | 157  | 0,41 | 0,05389 | 0,00105 | 0,39010 | 0,00895 | 0,611 | 307,1  | 27,4 | 338,4 | 6,4  | -1,2 |
| SCV30-10.2 | 361  | 130  | 0,37 | 0,05467 | 0,00120 | 0,40857 | 0,01130 | 0,570 | 379,5  | 37,6 | 343,1 | 7,3  | 1,4  |
| SCV30-11.1 | 481  | 177  | 0,38 | 0,05385 | 0,00070 | 0,36994 | 0,00614 | 0,562 | 186,9  | 24,0 | 338,1 | 4,3  | -5,8 |
| SCV30-11.2 | 483  | 239  | 0,51 | 0,05321 | 0,00102 | 0,38423 | 0,00869 | 0,613 | 301,7  | 26,8 | 334,2 | 6,3  | -1,2 |

|            |      |      |      |         |         |         |         |       |        |      |       |      |      |
|------------|------|------|------|---------|---------|---------|---------|-------|--------|------|-------|------|------|
| SCV30-12.1 | 719  | 245  | 0,35 | 0,02944 | 0,00083 | 0,44333 | 0,01267 | 0,712 | 1786,3 | 7,4  | 187,1 | 5,3  | 49,8 |
| SCV30-13.1 | 359  | 160  | 0,46 | 0,05235 | 0,00105 | 0,36561 | 0,00875 | 0,602 | 225,3  | 30,0 | 328,9 | 6,4  | -4,0 |
| SCV30-13.2 | 450  | 170  | 0,39 | 0,05296 | 0,00094 | 0,36518 | 0,00720 | 0,648 | 195,5  | 20,0 | 332,7 | 5,8  | -5,2 |
| SCV30-14.1 | 480  | 211  | 0,45 | 0,05669 | 0,00170 | 0,38138 | 0,01290 | 0,639 | 137,9  | 36,4 | 355,4 | 10,3 | -8,4 |
| SCV30-15.1 | 427  | 167  | 0,40 | 0,04984 | 0,00050 | 0,34477 | 0,00568 | 0,441 | 203,1  | 29,8 | 313,5 | 5,1  | -4,2 |
| SCV30-2.1  | 376  | 161  | 0,44 | 0,05429 | 0,00072 | 0,42803 | 0,00651 | 0,626 | 498,5  | 16,4 | 340,8 | 4,4  | 5,8  |
| SCV30-3.1  | 376  | 135  | 0,37 | 0,05437 | 0,00067 | 0,42314 | 0,00595 | 0,629 | 470,1  | 15,0 | 341,3 | 4,1  | 4,8  |
| SCV30-4.1  | 418  | 171  | 0,42 | 0,05604 | 0,00055 | 0,42257 | 0,00991 | 0,301 | 399,5  | 47,0 | 351,5 | 3,3  | 1,8  |
| SCV30-5.1  | 455  | 160  | 0,36 | 0,05456 | 0,00074 | 0,40305 | 0,00710 | 0,557 | 353,3  | 25,0 | 342,5 | 4,6  | 0,4  |
| SCV30-6.1  | 244  | 88   | 0,37 | 0,05657 | 0,00109 | 0,44446 | 0,00998 | 0,619 | 490,9  | 25,2 | 354,7 | 6,6  | 5,0  |
| SCV30-6.2  | 185  | 61   | 0,34 | 0,05553 | 0,00074 | 0,42005 | 0,01419 | 0,284 | 406,7  | 68,0 | 348,4 | 4,6  | 2,2  |
| SCV30-7.1  | 267  | 92   | 0,35 | 0,05381 | 0,00101 | 0,41150 | 0,00837 | 0,662 | 430,7  | 17,8 | 337,9 | 6,2  | 3,4  |
| SCV30-9.1  | 466  | 205  | 0,45 | 0,05365 | 0,00061 | 0,40258 | 0,00720 | 0,456 | 388,5  | 30,8 | 336,9 | 3,7  | 2,0  |
| SCV30-9.2  | 581  | 255  | 0,45 | 0,04961 | 0,00047 | 0,36514 | 0,00358 | 0,701 | 344,9  | 5,2  | 312,1 | 2,9  | 1,2  |
| SCV30-9.3  | 492  | 248  | 0,52 | 0,05641 | 0,00113 | 0,39114 | 0,00826 | 0,685 | 208,5  | 15,0 | 353,7 | 6,9  | -5,6 |
| SCV7-1.1   | 2884 | 1518 | 0,54 | 0,02638 | 0,00117 | 0,21815 | 0,00977 | 0,712 | 602,7  | 12,2 | 167,9 | 7,4  | 16,2 |
| SCV7-10.1  | 1390 | 580  | 0,43 | 0,04959 | 0,00098 | 0,38857 | 0,00850 | 0,647 | 484,9  | 19,6 | 312,0 | 6,0  | 6,4  |
| SCV7-11.1  | 1483 | 645  | 0,45 | 0,05203 | 0,00220 | 0,41086 | 0,01783 | 0,701 | 501,9  | 20,0 | 327,0 | 13,5 | 6,4  |
| SCV7-12.1  | 1456 | 543  | 0,38 | 0,05214 | 0,00129 | 0,42438 | 0,01129 | 0,669 | 568,3  | 19,8 | 327,6 | 7,9  | 8,8  |
| SCV7-13.1  | 1121 | 490  | 0,45 | 0,05113 | 0,00112 | 0,41040 | 0,00995 | 0,650 | 537,9  | 21,4 | 321,4 | 6,8  | 8,0  |
| SCV7-15.1  | 1376 | 636  | 0,47 | 0,05060 | 0,00087 | 0,41153 | 0,00780 | 0,653 | 566,7  | 15,4 | 318,2 | 5,4  | 9,0  |
| SCV7-16.1  | 1359 | 735  | 0,55 | 0,05294 | 0,00043 | 0,38295 | 0,00375 | 0,601 | 305,7  | 9,0  | 332,5 | 2,6  | -1,0 |
| SCV7-17.1  | 1210 | 585  | 0,50 | 0,05436 | 0,00074 | 0,39579 | 0,00577 | 0,676 | 320,7  | 7,8  | 341,2 | 4,5  | -0,8 |
| SCV7-18.1  | 1292 | 751  | 0,60 | 0,04754 | 0,00063 | 0,35853 | 0,00516 | 0,665 | 399,9  | 9,4  | 299,4 | 3,9  | 3,8  |
| SCV7-19.1  | 1866 | 1250 | 0,69 | 0,05215 | 0,00079 | 0,37762 | 0,00697 | 0,591 | 307,9  | 22,4 | 327,7 | 4,8  | -0,8 |
| SCV7-2.1   | 662  | 260  | 0,40 | 0,04030 | 0,00286 | 0,31957 | 0,02273 | 0,718 | 511,3  | 9,4  | 254,7 | 17,7 | 9,6  |
| SCV7-20.1  | 555  | 235  | 0,43 | 0,05383 | 0,00106 | 0,39110 | 0,00782 | 0,707 | 315,5  | 2,4  | 338,0 | 6,5  | -0,8 |
| SCV7-20.2  | 758  | 344  | 0,47 | 0,05554 | 0,00121 | 0,40958 | 0,00940 | 0,683 | 349,3  | 14,2 | 348,5 | 7,4  | 0,0  |

|           |      |      |      |         |         |         |         |       |        |      |       |      |      |
|-----------|------|------|------|---------|---------|---------|---------|-------|--------|------|-------|------|------|
| SCV7-21.1 | 1710 | 978  | 0,59 | 0,04311 | 0,00123 | 0,33488 | 0,00968 | 0,711 | 465,9  | 6,4  | 272,1 | 7,6  | 7,2  |
| SCV7-23.1 | 1474 | 962  | 0,67 | 0,04665 | 0,00080 | 0,33866 | 0,00650 | 0,644 | 314,1  | 17,6 | 293,9 | 4,9  | 0,8  |
| SCV7-24.1 | 1136 | 553  | 0,50 | 0,04749 | 0,00129 | 0,34389 | 0,00945 | 0,713 | 308,1  | 3,2  | 299,1 | 8,0  | 0,4  |
| SCV7-25.1 | 863  | 382  | 0,45 | 0,05251 | 0,00094 | 0,37793 | 0,00740 | 0,656 | 294,1  | 16,4 | 329,9 | 5,7  | -1,4 |
| SCV7-26.1 | 1124 | 545  | 0,50 | 0,05312 | 0,00095 | 0,37831 | 0,00705 | 0,693 | 270,1  | 8,0  | 333,6 | 5,8  | -2,4 |
| SCV7-27.1 | 1563 | 662  | 0,43 | 0,05304 | 0,00080 | 0,37997 | 0,00605 | 0,680 | 283,3  | 8,6  | 333,2 | 4,9  | -1,8 |
| SCV7-28.1 | 3177 | 3857 | 1,25 | 0,02215 | 0,00118 | 0,23183 | 0,01267 | 0,700 | 1093,1 | 24,6 | 141,2 | 7,4  | 33,4 |
| SCV7-29.1 | 1017 | 437  | 0,44 | 0,05333 | 0,00089 | 0,39010 | 0,00670 | 0,698 | 331,1  | 4,8  | 334,9 | 5,4  | -0,2 |
| SCV7-3.1  | 2131 | 819  | 0,39 | 0,04707 | 0,00256 | 0,43678 | 0,02385 | 0,716 | 847,1  | 8,8  | 296,5 | 15,7 | 19,4 |
| SCV7-30.1 | 1650 | 826  | 0,51 | 0,05377 | 0,00083 | 0,39180 | 0,00628 | 0,691 | 322,3  | 6,0  | 337,6 | 5,0  | -0,6 |
| SCV7-31.1 | 1690 | 872  | 0,53 | 0,05365 | 0,00084 | 0,39632 | 0,00690 | 0,645 | 353,5  | 15,2 | 336,9 | 5,2  | 0,6  |
| SCV7-32.1 | 579  | 220  | 0,39 | 0,05432 | 0,00050 | 0,40555 | 0,00605 | 0,443 | 377,1  | 25,0 | 341,0 | 3,0  | 1,4  |
| SCV7-33.1 | 1360 | 516  | 0,39 | 0,05382 | 0,00102 | 0,42370 | 0,01126 | 0,512 | 495,1  | 40,0 | 338,0 | 6,3  | 5,8  |
| SCV7-34.1 | 2781 | 2066 | 0,76 | 0,03210 | 0,00129 | 0,35283 | 0,01443 | 0,707 | 1189,9 | 13,2 | 203,7 | 8,1  | 33,6 |
| SCV7-35.1 | 901  | 386  | 0,44 | 0,05337 | 0,00196 | 0,39665 | 0,01500 | 0,699 | 367,1  | 18,4 | 335,2 | 12,0 | 1,2  |
| SCV7-36.1 | 1180 | 513  | 0,45 | 0,05408 | 0,00095 | 0,40171 | 0,00769 | 0,660 | 365,7  | 15,2 | 339,5 | 5,8  | 1,0  |
| SCV7-37.1 | 1014 | 438  | 0,44 | 0,05310 | 0,00052 | 0,40057 | 0,00476 | 0,593 | 400,5  | 12,6 | 333,5 | 3,2  | 2,6  |
| SCV7-38.1 | 1676 | 812  | 0,50 | 0,05405 | 0,00090 | 0,40322 | 0,00751 | 0,645 | 375,5  | 16,8 | 339,3 | 5,5  | 1,4  |
| SCV7-39.1 | 1271 | 649  | 0,52 | 0,04977 | 0,00052 | 0,38818 | 0,00441 | 0,665 | 474,7  | 5,2  | 313,1 | 3,2  | 6,0  |
| SCV7-4.1  | 835  | 331  | 0,41 | 0,04915 | 0,00093 | 0,37554 | 0,00751 | 0,684 | 428,9  | 11,2 | 309,3 | 5,7  | 4,4  |
| SCV7-40.1 | 1446 | 718  | 0,51 | 0,04917 | 0,00058 | 0,37901 | 0,00480 | 0,677 | 448,7  | 5,2  | 309,4 | 3,6  | 5,2  |
| SCV7-41.1 | 957  | 464  | 0,50 | 0,05497 | 0,00118 | 0,43093 | 0,01065 | 0,626 | 486,1  | 25,4 | 344,9 | 7,2  | 5,2  |
| SCV7-5.1  | 349  | 103  | 0,30 | 0,04841 | 0,00223 | 0,39980 | 0,01883 | 0,704 | 599,9  | 19,8 | 304,8 | 13,8 | 10,8 |
| SCV7-6.1  | 752  | 295  | 0,40 | 0,05230 | 0,00109 | 0,40576 | 0,00902 | 0,674 | 463,1  | 15,2 | 328,6 | 6,6  | 5,0  |
| SCV7-7.1  | 1771 | 935  | 0,54 | 0,05184 | 0,00160 | 0,39068 | 0,01220 | 0,710 | 398,1  | 8,6  | 325,8 | 9,8  | 2,8  |
| SCV7-8.1  | 1369 | 615  | 0,46 | 0,04817 | 0,00054 | 0,37825 | 0,00676 | 0,450 | 489,7  | 29,6 | 303,3 | 3,3  | 7,0  |
| SCV7-9.1  | 1719 | 839  | 0,50 | 0,04441 | 0,00103 | 0,35317 | 0,00841 | 0,704 | 517,5  | 7,4  | 280,1 | 6,4  | 8,8  |
